# 1            **Synchrony and idiosyncrasy in the gut microbiome of wild primates**

2  
3            **Authors:** Johannes R. Björk<sup>1\*</sup>, Mauna R. Dasari<sup>1</sup>, Kim Roche<sup>2</sup>, Laura Grieneisen<sup>3</sup>, Trevor J.  
4 Gould<sup>3</sup>, Jean-Christophe Grenier<sup>4,5</sup>, Vania Yotova<sup>4</sup>, Neil Gottel<sup>6</sup>, David Jansen<sup>1</sup>, Laurence R.  
5 Gesquiere<sup>7</sup>, Jacob B. Gordon<sup>7</sup>, Niki H. Learn<sup>8</sup>, Tim L. Wango<sup>9,10</sup>, Raphael S. Mututua<sup>9</sup>, J.  
6 Kinyua Warutere<sup>9</sup>, Long'ida Siodi<sup>9</sup>, Sayan Mukherjee<sup>2</sup>, Luis B. Barreiro<sup>11</sup>, Susan C.  
7 Alberts<sup>7,12,13</sup>, Jack A. Gilbert<sup>6</sup>, Jenny Tung<sup>7,12,13,14</sup>, Ran Blekhman<sup>3,15</sup>, Elizabeth A. Archie<sup>1\*</sup>

## 8            **Affiliations:**

9            <sup>1</sup> Department of Biological Sciences, University of Notre Dame, Notre Dame, IN 46556, USA

10           <sup>2</sup> Program in Computational Biology and Bioinformatics, Duke University, Durham, NC 27708,  
11 USA

12           <sup>3</sup> Department of Genetics, Cell Biology, and Development, University of Minnesota,  
13 Minneapolis, MN 55455, USA

14           <sup>4</sup> Department of Genetics, CHU Sainte Justine Research Center, Montréal, QC, H3T1C5,  
15 Canada.

16           <sup>5</sup> Research Center, Montreal Heart Institute, Montréal, Quebec H1T 1C8, Canada

17           <sup>6</sup> Department of Pediatrics and the Scripps Institution of Oceanography, University of California,  
18 San Diego, San Diego, CA 92093, USA

19           <sup>7</sup> Department of Biology, Duke University, Durham, NC 27708, USA

20           <sup>8</sup> Department of Ecology and Evolutionary Biology, Princeton University, Princeton, NJ 08544,  
21 USA

22           <sup>9</sup> Amboseli Baboon Research Project, Amboseli National Park, Kenya

23           <sup>10</sup> The Department of Veterinary Anatomy and Animal Physiology, University of Nairobi, Kenya

24           <sup>11</sup> Department of Medicine, Section of Genetic Medicine, University of Chicago, Chicago, IL  
25 60637, USA

26           <sup>12</sup> Department of Evolutionary Anthropology, Duke University, Durham, NC 27708, USA

27           <sup>13</sup> Duke University Population Research Institute, Duke University, Durham, NC 27708, USA

28           <sup>14</sup> Canadian Institute for Advanced Research, Toronto, Ontario M5G 1M1, Canada

29           <sup>15</sup> Department of Ecology, Evolution, and Behavior, University of Minnesota, Minneapolis, MN  
30 55455, USA

31           \* Correspondence to: [bjork.johannes@gmail.com](mailto:bjork.johannes@gmail.com); [earchie@nd.edu](mailto:earchie@nd.edu)

32 **Abstract:** Human gut microbial dynamics are highly individualized, making it challenging to  
33 link microbiota to health and to design universal microbiome therapies. This individuality is  
34 typically attributed to variation in diets, environments, and medications, but it could also emerge  
35 from fundamental ecological forces that shape primate microbiota more generally. Here we  
36 leverage extensive gut microbiome time series from wild baboons—hosts who experience little  
37 interindividual dietary and environmental heterogeneity—to test whether gut microbial dynamics  
38 are synchronized across hosts or largely idiosyncratic. Despite their shared lifestyles, we find  
39 strong evidence for idiosyncrasy. Over time, samples from the same baboon were much more  
40 similar than samples from different baboons, and host-specific factors collectively explained  
41 30% of the deviance in microbiome dynamics, compared to just 3% for factors shared across  
42 hosts. Hence, individualization may be common to mammalian gut microbiota, and designing  
43 universal microbiome interventions may face challenges beyond heterogeneity in human  
44 lifestyles.

45

## 46 **Introduction**

47 Mammalian gut microbiomes are highly complex, dynamic ecosystems. From these  
48 dynamics emerge a set of life-sustaining services for hosts, which help them digest food, process  
49 toxins, and resist invading pathogens. Despite their importance, our understanding of gut  
50 microbial dynamics, especially the collective dynamics of microbial communities from hosts  
51 living in the same population, is remarkably poor (*1*). This gap exists in part because we lack  
52 time series data that track gut microbiota longitudinally across many hosts in the same  
53 population. As a result, we cannot answer key questions. For example, when host populations  
54 encounter shifting environments and resources, does each host’s microbiota respond similarly—  
55 i.e., in synchrony—or idiosyncratically to these changes? Further, are microbial dynamics  
56 especially similar when hosts live in the same social unit or have shared traits, such as age, sex or  
57 social status?

58 Answering these questions is important because synchronized host microbiomes could  
59 help explain shared microbiome-associated traits in host populations, such as patterns of disease  
60 susceptibility (*2, 3*). A high degree of microbiome synchrony could also be good news for  
61 researchers working to predict microbiome dynamics because it would suggest that similar

62 ecological principles govern microbiome dynamics across hosts (4). There is also theoretical  
63 justification to expect some degree of synchrony, as host populations and their microbiomes can  
64 be considered a ‘microbiome metacommunity’ (see e.g., 5, 6-8). Metacommunity theory predicts  
65 that synchrony will arise across microbiomes if hosts experience similar environmental  
66 conditions and/or high rates of microbial dispersal between each host’s microbiome (9, 10).

67         However, even in the presence of synchronizing forces like shared environments and  
68 high rates of microbial dispersal, there are many reasons why hosts in a microbiome  
69 metacommunity could exhibit idiosyncratic (i.e., individualized) microbiome compositions and  
70 dynamics. Idiosyncratic dynamics are expected when the same microbes in different hosts  
71 respond in different ways to environmental fluctuations, chance events, and/or interactions with  
72 other microbes (11-14). These forces are likely to be important in the gut microbiome where  
73 priority effects, functional redundancy, and horizontal gene flow can cause the same microbial  
74 taxon to perform different functions, play different ecological roles, and exhibit different  
75 environmental responses in different hosts (15, 16). Furthermore, in humans, gut microbiome  
76 dynamics are often described as “personalized” (17, 18). However, personalized dynamics in  
77 humans are nearly always attributed to large interpersonal differences in diet, medications, and  
78 lifestyles (19-22), and not to fundamentally different microbiome responses to the environment  
79 itself (19). If personalized dynamics persist in a different primate species, even in the presence of  
80 shared environments, this pattern would suggest that: (i) host-specific dynamics are a common  
81 feature of primate gut microbial communities (i.e., are not unique to humans and are not solely  
82 attributable to large interpersonal differences in human lifestyles); (ii) predicting gut microbial  
83 dynamics in individual hosts may prove difficult; and (iii) microbiome interventions to improve  
84 human health may face challenges beyond heterogeneity in human lifestyles, and instead may be  
85 related to the fundamental ecological principles that govern the gut microbiome.

86

## 87 **Data and methods**

88         Here we test the degree to which gut microbiome compositions and dynamics in a host  
89 population are synchronized versus idiosyncratic using extensive time series data from a  
90 population of wild baboons in the Amboseli ecosystem in Kenya (23). Baboons are terrestrial  
91 primates that live in stable social groups, typically with 20 to 130 members. The 600 baboons in

92 our data set lived in 12 social groups over a 14-year span (April 2000 to September 2013; 5  
93 original groups and 7 groups that were fission/fusion products from these original groups; **Fig.**  
94 **1A**). The baboons were members of the well-studied Amboseli baboon population (23), which  
95 has been studied by the Amboseli Baboon Research Project since 1971. This project collected  
96 detailed longitudinal data on the weather the animals experienced; their social group  
97 memberships, ranging patterns and diets; and host traits such as age, sex, social relationships,  
98 and dominance ranks (see Supplementary Materials).

99       Importantly, like many natural host populations, the Amboseli baboons experience shared  
100 diets, environments, and opportunities for between-host microbial dispersal that could drive  
101 microbiome synchrony across hosts. Because baboons are not territorial, all 12 baboon social  
102 groups used an overlapping ~60 km<sup>2</sup> range (**Fig. 1B**; **video S1**; (24)). Hence all animals were  
103 exposed to similar microbes from the environment and shared seasonal changes in rainfall and  
104 temperature (24-26). The Amboseli ecosystem is a semi-arid savanna where very little rain falls  
105 from June to October, with highly variable rainfall between November and May (**Fig. 1C**; mean  
106 annual rainfall between 2000 and 2013 was 319 mm; range = 140 mm to 559 mm). These  
107 seasonal shifts in climate drive a rotating set of foods consumed by the baboons: during the dry  
108 season the baboons rely largely on grass corms, shifting to growing grass blades and grass seed  
109 heads in the wet season (**Fig. 1D**). Within baboon social groups, diets and environments are  
110 especially congruent because group members travel together in a coordinated fashion across the  
111 landscape, encountering and consuming resources and feeding on the same seasonally available  
112 foods at the same time (24, 27-31). Group members also groom each other, combing through  
113 each other's fur and placing some items in their mouths, which may contribute to host-to-host  
114 microbial transmission (32). Finally, at the level of individual hosts, host genetic variation has a  
115 consistent, albeit modest, effect on gut microbiome composition in this population (24). Other  
116 host-specific traits, like age, sex, and social status, also lead some individuals to share aspects of  
117 their behavior, immune profiles, and physiology, which could also lead to more congruent  
118 microbiome dynamics.

119       A key advance in our study is longitudinal sampling of gut microbial composition via  
120 16S rRNA gene sequencing from fecal samples collected from hundreds of known baboons  
121 throughout their lives (**Fig. 1A**). Such dense, long-term, longitudinal microbiome sampling is  
122 difficult to achieve in many animals, including humans. The 17,265 fecal samples in our study

123 were collected from baboons who ranged in age from 7.4 months to 27.7 years, spanning these  
124 animals' natural lifespans (**fig. S1A**). Each baboon was sampled a median of 19 times, and 124  
125 baboons were sampled at least 50 times (**fig. S1B**). On average, these samples spanned 4.3 years  
126 of a baboon's life (range = 4 days to 13.2 years; **fig. S1C**), with a median of 35 days between  
127 consecutive samples (**fig. S1D**).

128 A large majority of the microbiome samples we use here were published in Grieneisen et  
129 al. (24), but we include 1,031 additional samples that were generated at the same time using the  
130 same methods (they were not included in Grieneisen et al. (24) because we lack pedigree  
131 information for these hosts). Briefly, we generated 896,911,162 sequencing reads (mean =  
132 51,913.6 reads per sample; range = 1021 - 477,241, **fig. S1E**). We retained microbial amplicon  
133 sequence variants (ASVs) with a minimum of 3 reads per sample that were seen in at least 20%  
134 of the samples, resulting in 341 microbial taxa at the ASV level (mean = 162 ASVs per sample;  
135 range = 19 - 311 ASVs; **fig S1F**). DNA concentration and ASV diversity were not predicted by  
136 time since sample collection (**fig. S1G, S1H**). Read counts were centered log-ratio transformed  
137 prior to all subsequent analyses (33, 34).



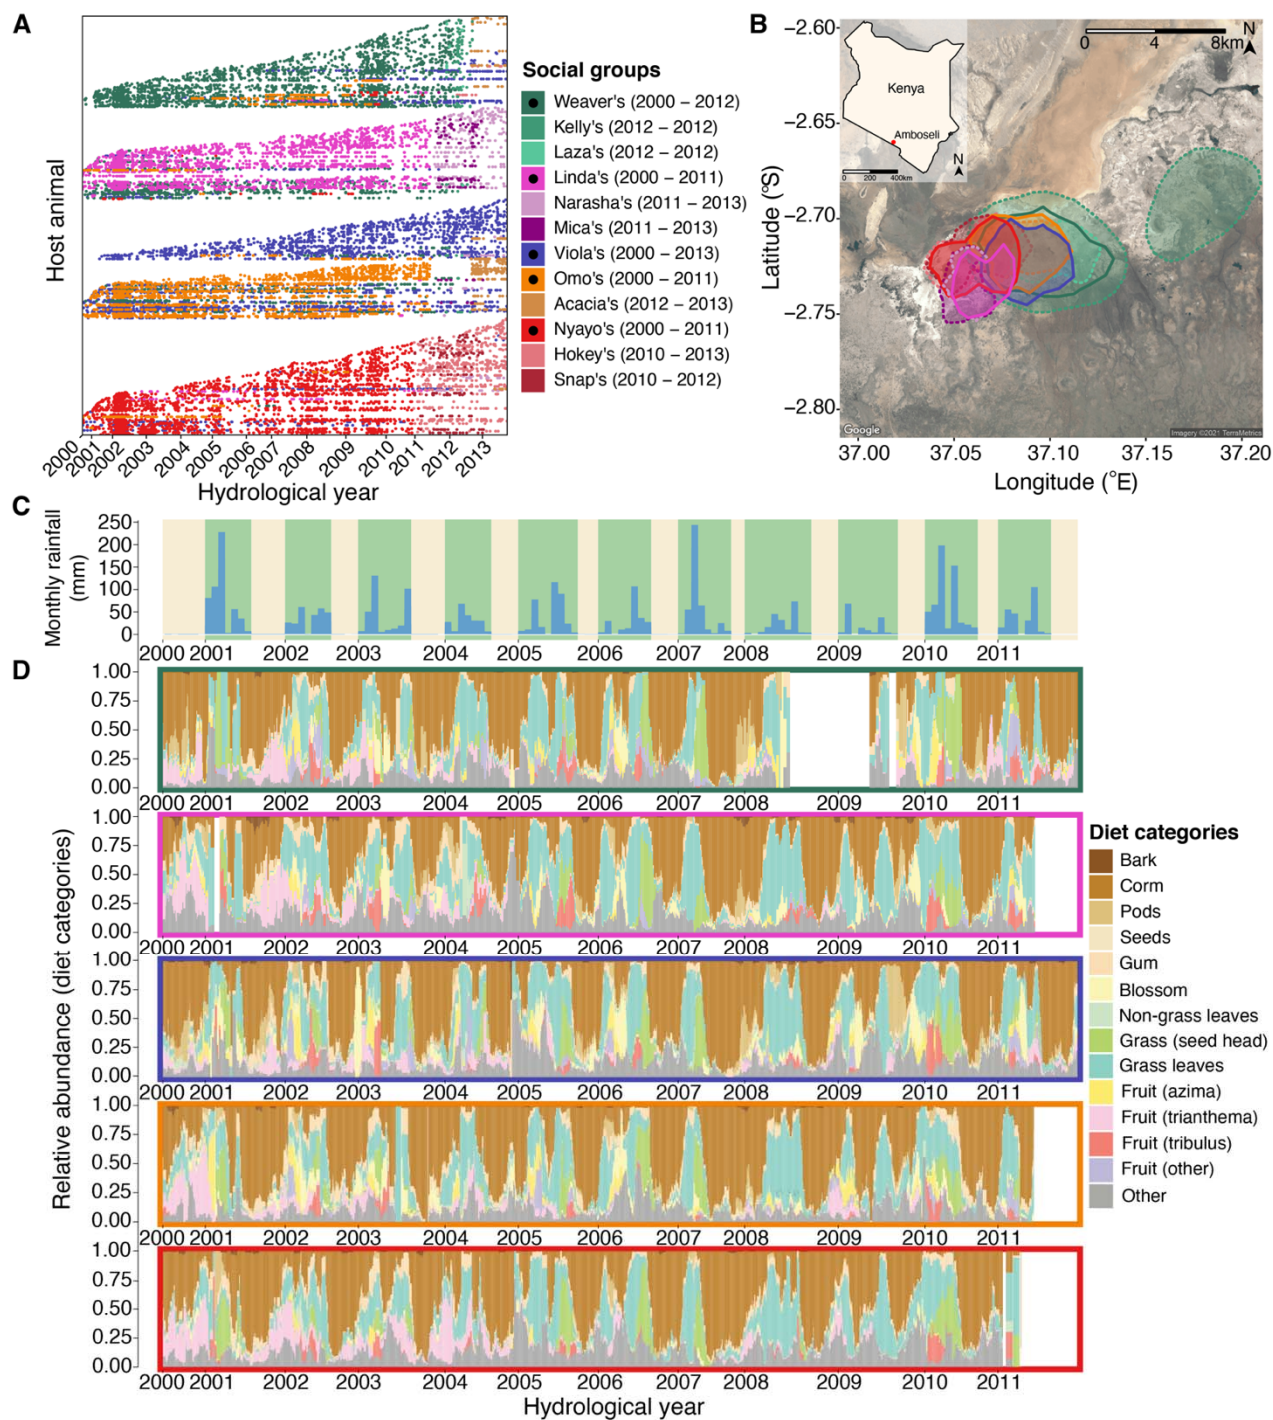

138

139 **Fig. 1. Baboons in Amboseli experience shared environments at multiple scales.** (A) The  
 140 microbiome time series consisted of 17,265 16S rRNA gut microbiome profiles. Each point  
 141 represents a microbiome sample, plotted by the date it was collected (x-axis). Each row (y-axis)  
 142 corresponds to a unique individual host. Samples were collected from 600 wild baboons living in  
 143 5 original social groups (indicated by dark colors marked with black dots in the legend) and 7

144 groups that fissioned/fused from these original groups (no black dots). **(B)** All baboon groups  
145 ranged over a shared  $\sim 60 \text{ km}^2$  area, and the social groups had largely overlapping home ranges.  
146 Ranges are shown as 90% kernel densities over the sampling period specific to each group; 5  
147 original social groups are shown with solid borders, fission and fusion products with dashed  
148 borders. **(C)** Monthly rainfall amounts (blue bars, in mm) with yellow and green stripes  
149 representing dry and wet seasons, respectively, with the width reflecting the number of months  
150 within the focal year that had at least 1 mm rainfall. **(D)** Temporal shifts in diet from the years  
151 2000 – 2013, shown as the relative abundance of diet components in the 5 original social groups  
152 over 30-day sliding windows. Colors correspond to the 13 most common food types, while the  
153 grey bars correspond to other or unknown food types. Colored boxes around each panel reflect  
154 each of the 5 original, most extensively sampled social groups (colors as in plots A and B). The  
155 white bars indicate time periods where no diet data were collected.

156

157 To test whether shared environmental conditions and host traits lead to similar gut  
158 microbial compositions and synchronized dynamics across the microbiome metacommunity, we  
159 used three main approaches (see Supplementary Materials for details of all analyses). First, we  
160 characterized patterns of temporal autocorrelation to identify hallmarks of compositional  
161 similarity and synchrony over time. Our expectation was that, if different baboons exhibit similar  
162 gut microbiome compositions and synchronized microbiome dynamics, then samples collected  
163 close in time across the metacommunity should be compositionally similar, and samples  
164 collected from the same host should not be substantially more similar than samples from  
165 different baboons. Alternatively, if hosts or social groups exhibit idiosyncratic compositions and  
166 dynamics, then samples collected close in time from the same baboon, or the same group, should  
167 be much more similar than they are to samples collected from different baboons living in  
168 different groups. These analyses were run in R (v 4.0.2; (35)) using custom-written functions  
169 (code and analyzed data are available on GitHub/OSF; see Data Statement).

170 Second, to test whether dispersal limitation could explain microbiome idiosyncrasy, we  
171 estimated metacommunity-wide microbial migration probabilities in each season and year using  
172 the Sloan Neutral Community Model for Prokaryotes (36, 37). This model assumes that each  
173 local community, defined as the microbial composition of a single host in a given season-year

174 combination, is the outcome of stochastic population dynamics and microbial immigration from  
175 other hosts in the microbiome metacommunity (i.e., other local communities). Briefly, local  
176 communities have a constant size  $N$ , and individual microbes within each local community die at  
177 a constant rate. These deaths create vacancies that can be occupied, either by individuals  
178 immigrating from the microbiome metacommunity (with probability  $m$ ), or by the offspring from  
179 any taxon within the local community (i.e., from reproduction within the same host, with  
180 probability  $1-m$ ). Species that are common in the metacommunity have a higher chance of  
181 occupying vacancies than rare species. Without immigration from the microbiome  
182 metacommunity, ecological drift leads each host's microbial diversity to reduce to a single taxon.  
183 Thus, the migration probability,  $m$ , represents the metacommunity-wide probability that any  
184 taxon, randomly lost from a given host/local community, will be replaced by dispersal from the  
185 microbiome metacommunity, as opposed to reproduction within hosts (36, 37). Following Burns  
186 et al. (38),  $m$  can be interpreted as a measure of dispersal limitation, such that low migration  
187 probabilities signify high dispersal limitation. We estimated season and hydrological year-  
188 specific values for  $m$  by defining the microbiome metacommunity as either the hosts' social  
189 group or the whole host population. We fit neutral models using nonlinear least-squares  
190 regression as implemented in the R package tyRa (39).

191 Third, to quantify the relative magnitude of idiosyncratic versus synchronized gut  
192 microbiome dynamics for different microbiome features, we used generalized additive models  
193 (GAMs) to capture non-linear, longitudinal changes in 52 gut microbiome features, including  
194 three principal components of microbial community variation, three indices of alpha diversity  
195 (species richness, the exponent of Shannon's  $H$ , and the inverse Simpson index, as computed by  
196 the function `reyni` from the R package `vegan` (40)), and the relative abundances of all 12 phyla  
197 and 34 families present in our data set, post filtering. GAMs allowed us to calculate the percent  
198 deviance in each feature's dynamics attributable to factors that could contribute to synchronized  
199 dynamics at different scales; percent deviance is a measure of goodness-of-fit for nonlinear  
200 models and is analogous to the unadjusted  $R^2$  for linear models. We considered three scales:  
201 factors experienced by the whole host population (e.g., rainfall and temperature), those  
202 differentiated by social groups (e.g., group identity, group home range location, and diet), and  
203 those differentiated at the level of individual hosts (e.g., host identity, sex, age, and social  
204 dominance rank; see below for complete model structures). If shared environments and traits



205 synchronize gut microbiome dynamics across hosts, these factors should explain substantial  
206 deviance in microbiome dynamics. Alternatively, if microbiome dynamics are idiosyncratic,  
207 population- and group-level factors will not explain considerable deviance and, instead, a large  
208 fraction of the deviance will be attributable to host identity, controlling for shared environments,  
209 behaviors, and traits. To ensure sufficiently dense sampling for identifying host- and group-level  
210 dynamics, all three models were run on a subset of the full data set, consisting of 4,277 16S  
211 rRNA gene sequencing profiles from the 56 best-sampled baboons living in the 5 social groups  
212 sampled the longest (between 2002 and 2010; min=48; median = 72.5; max = 164 samples; **fig.**  
213 **S2**). GAMs were fit using the R package *mgcv* (41-43).

214 Notably, the GAM approach allows us to identify the percent deviance attributable to  
215 host identity, but does not identify the specific characteristics that account for host identity  
216 effects. Genetic effects are a likely candidate, as previous analyses demonstrate that taxon  
217 abundance and summaries of gut microbiome position are lowly to moderately heritable in this  
218 population (24). To evaluate this possibility, we tested the relationship between the deviance  
219 explained in our GAMs for each microbiome taxon and the heritability of that taxon's relative  
220 abundance (24). If host effects on microbiome dynamics are in part explained by host genotype,  
221 we predicted that taxon heritability should be positively correlated with deviance explained at the  
222 host level (i.e., model P+G+H), but not at the group or population level (i.e., model P and model  
223 P+G).

## 224 **Results and Discussion**

### 225 **Baboon gut microbiota exhibit cyclical shifts in community composition across seasons and** 226 **years**

227 We began by visualizing annual and inter-annual fluctuations across the gut microbiome  
228 metacommunity over the 14-year span of the data. Consistent with prior research on primates  
229 (44-46), we found population-wide, cyclical shifts in microbiome composition across seasons  
230 and years (**Fig. 2**). This wet-dry seasonal cyclicity was primarily observable in the first principal  
231 component (PC1) of a principal component analysis (PCA) of clr-transformed read counts for all  
232 17,265 samples (**Fig. 2A, 2B; fig. S3-S5**; PC1 explains 16.5% of the variance in microbiome  
233 community composition). PC1 tended to exhibit low values during the dry season, and high  
234 values during the wet season, mirroring monthly rainfall (**Fig. 2B; fig. S5**). PC1 was also linked  
235 to annual rainfall across years, exhibiting especially low values throughout 2008 and 2009,  
236 which corresponded to the worst continuous drought in the Amboseli ecosystem in 50 years (**Fig.**  
237 **2A, 2B**). We also observed small, but statistically significant seasonal differences in PC2 and  
238 PC3 (8.4% and 3.7% of variation in community composition; **Fig. 2C; fig. S3-S5**) and in  
239 measures of alpha diversity (**Fig. 2C; fig. S5, S6**), as has been reported in other ecosystems (47).

240 In terms of individual microbiome taxa, 17% of phyla (2 of 12) and 38% of families (13  
241 of 34) exhibited significant changes in relative abundance between the wet and dry seasons (**Fig.**  
242 **2C; table S1**; linear models with a false discovery rate (FDR) threshold = 0.05 for n = 393  
243 models). These changes were significant for the phyla Firmicutes and Tenericutes (**Fig. 2C, 2D;**  
244 **fig. S7**), and were especially pronounced for the families Helicobacteraceae, Coriobacteriaceae,  
245 Burkholderaceae, Bacteroidales RF16 group, vadinBE97, Spirochaetaceae, and  
246 Campylobacteraceae (**Fig. 2C; fig. S8**). 28% of ASVs also exhibited significant changes in  
247 abundance across seasons (97 of 341 ASVs; linear models with FDR threshold = 0.05 for n =  
248 393 models; **fig. S9; table S2**). The majority of gut microbial taxa at the ASV, family and  
249 phylum level did not exhibit significant changes in abundance across seasons, suggesting that  
250 these taxa play consistent roles in the gut ecosystem throughout the year, including  
251 Kiritimatiellaeota, Elusomicobia, Ruminococcaceae, Clostridiaceae 1, and Rikenellaceae  
252 (**Fig. 2C; fig. S7, S8; table S1**).

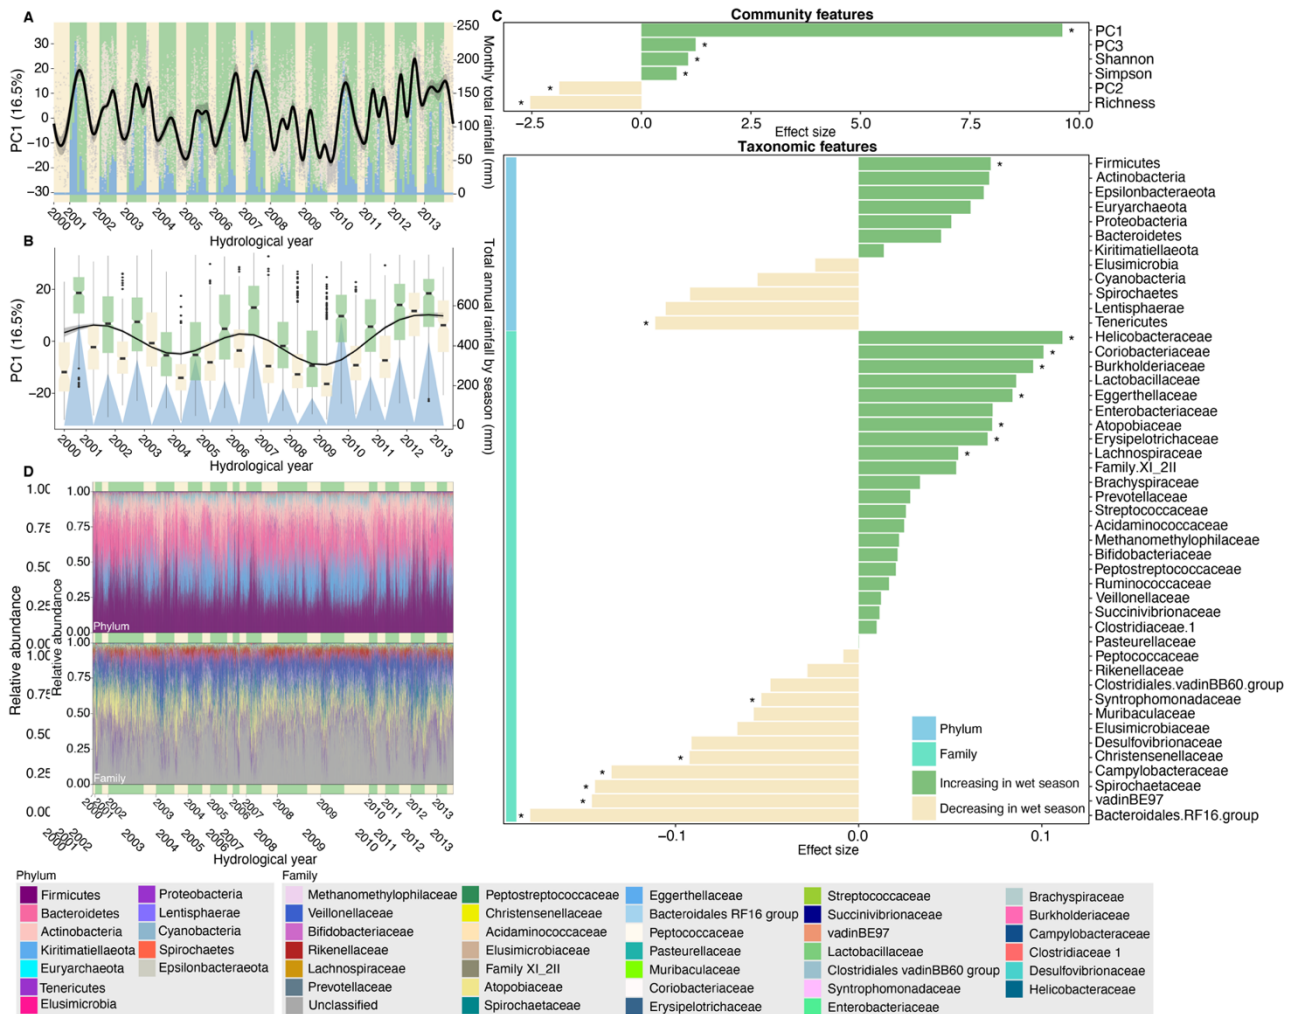

253

254

255

256

257

258

259

260

261

262

263

264

265

**Fig. 2. Baboons show population-wide, cyclical shifts in microbiome composition across seasons and years.** (A) Changes in microbiome PC1 mirror monthly rainfall across the 14 years of the data set. The grey points show each sample's value for PC1 (y-axis) on the date it was collected. The black line shows the predicted daily trend for PC1 across samples, treating time (x-axis) as a continuous variable from April 21, 2000 to September 19, 2013. The corresponding gray ribbon shows the 95% simultaneous confidence interval. Blue bars show monthly rainfall (right-hand y-axis). Yellow and green bars in the background represent dry and wet seasons, respectively, with the width reflecting the number of months within the focal year with at least 1 mm rainfall. (B) Changes in microbiome PC1 on an annual scale across the 14 years of the data set. The box plots show the average distribution of microbiome PC1 in wet (green) and dry (yellow) seasons. The black line shows the estimated annual trend for PC1 across all hydrological years, and the blue triangles show total annual rainfall (right-hand y-axis). (C) The

266 effect of season varies across 52 features of the microbiome, including six community features  
267 (top panel) and 46 taxonomic features (bottom panel; 12 phyla: light blue vertical bar; 34  
268 families: turquoise vertical bar; for 341 ASVs, see Fig. S12). Each horizontal bar shows the  
269 effect of season from linear mixed models, with each feature as the dependent variable. Asterisks  
270 indicate features that changed significantly between the wet and dry seasons (FDR threshold =  
271 0.05 for  $n = 393$  models). See **figs. S7, S8** for feature-specific smooths and **fig. S9** and **table S2**  
272 for results for ASVs. Samples from the same host collected on the same date were averaged prior  
273 to running the linear models. **(D)** Bar plots showing the relative abundance of all 12 microbial  
274 phyla (above) and 34 families (below) across all samples. Green and yellow bars in the  
275 background represent wet and dry seasons, with the width corresponding to the number of  
276 samples in the focal hydrological year and season.

277

## 278 **Baboons exhibit largely idiosyncratic gut microbiome compositions and dynamics**

279 While the microbiome metacommunity exhibited cyclical, seasonal shifts in  
280 composition, microbiome dynamics across different baboons were not strongly synchronized.  
281 Instead, patterns of temporal autocorrelation indicated that each baboon exhibited largely  
282 individualized gut microbiome compositions and dynamics (**Fig. 3**). In support, samples  
283 collected from the same baboon within a few days were much more similar to each other than  
284 they were to samples collected from different baboons over the same time span, regardless of  
285 whether those animals lived in the same or a different social group (**Fig 3A, 3B**; Kruskal-Wallis:  
286  $p < 2.2 \times 10^{-16}$  for all comparisons). Likewise, a PERMANOVA of Aitchison distances between all  
287 samples revealed that host identity explained 8.6% ( $p < 0.001$ ) of the variation in community  
288 composition, much larger than sampling day or month ( $r^2 = 2.5\%$  and  $1.4\%$ ), group membership  
289 ( $2.2\%$ ), or the first three principal components of diet ( $0.04\%$  to  $2.4\%$ ; **table S3**; **fig. S10**).

290 Compositional similarity among samples from the same baboon fell steeply for samples  
291 collected a few days to a few months apart (**Fig. 3A, 3C**). However, similarity rose again slightly  
292 at 12-month intervals, reflecting the seasonal dynamics in **Fig. 2**. These 12-month peaks in  
293 similarity were visible, even for samples collected more than 5 years apart, indicating that  
294 individual hosts and the population at large return to somewhat similar microbiome community  
295 states on 12-month cycles across years (**Fig. 3C**). Individualized host compositional signatures

296 persisted for several years (**Fig. 3A, 3C; fig. S11**). Indeed, the 95% confidence intervals on  
297 Aitchison similarity between samples collected from the same vs different hosts rarely  
298 overlapped for samples collected less than two years apart (**fig. S11B, S11C**).

299 Individualized gut microbiome dynamics can also be seen by visualizing microbiome  
300 compositional similarity between hosts living in the population at the same time (**Fig. 3D; fig.**  
301 **S12**). For instance, especially dense sampling during the 2008-2009 hydrological year meant that  
302 we were able to collect at least one sample, for at least 10 months of the year, from 17 of our  
303 study subjects. When we aligned these time series, we observed no shared pattern of change in  
304 the top three principal components of microbiome composition across time beyond some overall  
305 seasonal patterns in PC1, nor did we see convergence to similar values within any given month  
306 (**Fig. 3D**). Consequently, the microbiome of each baboon took a different path over the  
307 ordination space over the same 1-year span (**fig. S12**). We found similar results for another dense  
308 sampling period in the 2007-2008 hydrological year (**fig. S13**).

309 Microbiome taxa varied in their contributions to individualized gut microbiome  
310 compositions (**Fig. 3E; fig. S14**). For example, for the 56 best-sampled hosts (**fig. S2**), several  
311 phyla and families exhibited substantial variation in host mean (clr-transformed) relative  
312 abundance (i.e., across repeated samples for that host) compared to their mean (clr-transformed)  
313 relative abundance across all hosts. These taxa included members of the phyla Cyanobacteria,  
314 Spirochaetes, Lentisphaerae, and Elusimicrobia, and the families Spirochaetaceae, vadinBE97,  
315 Elusimicrobaceae, and Muribaculaceae (**Fig. 3E; fig. S14**). These highly variable taxa tended to  
316 exhibit, on average, below-average abundance compared to less variable taxa that tended to  
317 exhibit, on average, above-average abundance, indicating that idiosyncratic dynamics may be  
318 more often linked to uncommon than common taxa (**fig. S15**).

319 To test whether individualized gut microbiome compositions and dynamics could be  
320 explained by microbial dispersal limitation between hosts, we used the Sloan Neutral  
321 Community Model for Prokaryotes to estimate metacommunity-wide migration probabilities,  $m$ ,  
322 for each season and hydrological year (36, 37). As described above,  $m$  provides a measure of  
323 dispersal limitation because it represents the probability that “vacancies” in a local community  
324 (i.e. a host’s microbiome) will be replaced by the process of dispersal from the microbiome  
325 metacommunity (i.e. other hosts), as opposed to reproduction within a focal host’s microbial



326 community (36, 37). We found little evidence that dispersal limitation contributed to  
 327 idiosyncratic compositions and dynamics; the estimated probability that a given ASV lost from a  
 328 host's microbiota would be replaced by an ASV from another host in the population was nearly  
 329 40% (the average host population-wide across season and hydrological years  $m = 0.373$ ; range =  
 330 0.332 to 0.416; black points on **fig. S16**). These migration probabilities are generally lower than  
 331 those Sieber et al. (8) found for marine sponges sampled from the same coastal location (range of  
 332  $m$  across sponge species: min=0.36; median=0.78; max=0.86) but much higher than for mice and  
 333 nematodes, both in natural and laboratory populations (mice:  $m_{wild} = 0.11$  and  $m_{lab} = 0.18$ ;  
 334 nematode:  $m_{wild} = 0.03$  and  $m_{lab} = 0.01$ ), indicating that dispersal limitation is relatively low for  
 335 baboon microbiota in Amboseli.

336 Interestingly, when we re-defined the microbiome metacommunity to be the host's social  
 337 group, instead of the whole host population, migration probabilities were similar (average  $m$   
 338 across groups = 0.355; range = 0.347 to 0.365; colored points on **fig. S16**). Hence, social group  
 339 membership likely does not represent a large barrier to microbial colonization between baboons,  
 340 as ASVs are widely shared across all members of the host population.

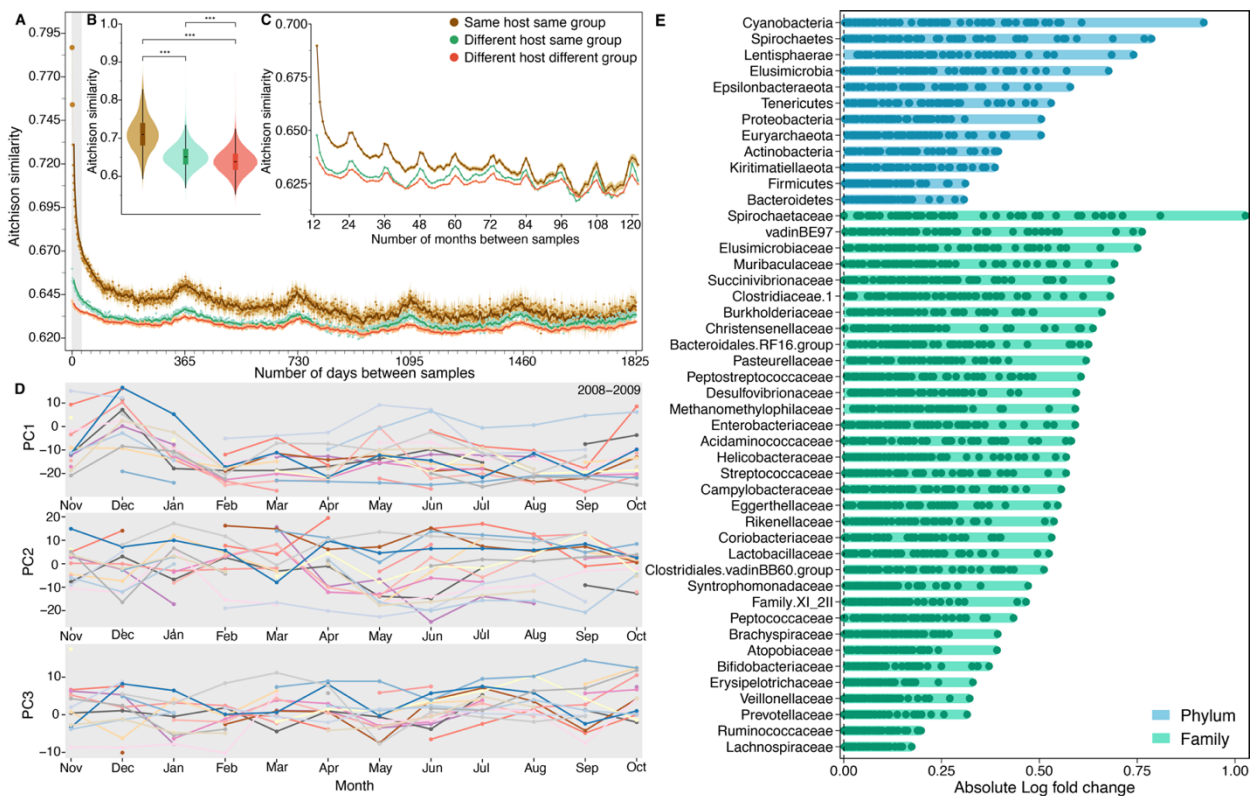

341

342 **Fig. 3. Baboons exhibit idiosyncratic gut microbiome compositions and dynamics. (A)**  
343 Temporal autocorrelation in microbiome Aitchison similarity (y-axis) as a function of the time  
344 between samples, plotted on a daily scale (x-axis), ranging from samples collected on the same  
345 day to samples collected 5 years apart. Small tick marks correspond to months. Brown points  
346 show average Aitchison similarity between samples collected from the same baboon; green  
347 points show similarity between samples from different baboons living in the same social group;  
348 orange points show similarity between samples from different baboons living in different social  
349 groups. The lines represent moving averages (window size = 7 days). **(B)** Average Aitchison  
350 similarity among samples collected within 10 days of each other. Samples from the same baboon  
351 are significantly more similar than samples collected from different baboons in the same or  
352 different social groups (Kruskal-Wallis;  $p = 2.22 \times 10^{-16}$ ). **(C)** Temporal autocorrelation in  
353 microbiome Aitchison similarity on monthly scales for samples collected up to 10 years apart.  
354 **(D)** Microbiome dynamics for 17 baboons for which we had at least one sample from 10 of the  
355 12 months of the 2008-2009 hydrological year (Nov 2008 to Oct 2009). Panels show each  
356 individual's values for microbiome PC1, PC2, and PC3; each colored line represents a distinct  
357 host. See **fig. S13** for similar results during another densely sampled time period. Gaps indicate  
358 that the focal host did not have a sample in a given month. **(E)** Some taxa have more  
359 idiosyncratic abundances than others. Each horizontal bar shows a given taxon's minimum and  
360 maximum absolute log fold change in abundance across the 56 best-sampled hosts (hosts are  
361 represented as points within the bars; see **fig. S2** for information on the best-sampled hosts).  
362 Absolute fold changes were calculated, for a given taxon in a given host, as the taxon's average  
363 clr-transformed abundance across all samples from that host, relative to the taxon's grand mean  
364 in all hosts in the population. Hosts with large absolute fold changes for a given taxon therefore  
365 have abundances of that taxon that are either well above or below-average compared to its  
366 abundance in the host population at large (hosts with points close to zero exhibited taxonomic  
367 abundances typical of the population at large). For many taxa, hosts varied in their absolute log  
368 ratio values, indicating that they also deviated substantially from each other in the abundance of  
369 those taxa. Taxa (y-axis) are ordered (from top to bottom) by their highest absolute log ratio  
370 value across the 56 best-sampled hosts. Blue bars represent microbial phyla; green bars represent  
371 families. See **fig. S14** for a longitudinal version of this analysis for the most and least  
372 idiosyncratic phyla and families.

373

374 **Shared environmental conditions are linked to modest synchrony across hosts**

375 To quantify the relative magnitude of idiosyncratic versus synchronized gut microbiome  
376 dynamics across the host population, social groups, and individual hosts, and to test whether  
377 synchrony varies for different microbiome features, we used generalized additive models  
378 (GAMs) to capture the nonlinear, longitudinal changes in 52 microbiome features (3 PCs of  
379 community variation, 3 metrics of alpha diversity, and clr-transformed relative abundances of 12  
380 phyla and 34 families). For each feature, we ran three GAMs to measure the deviance explained  
381 in gut microbiome dynamics by successive sets of parameters, reflecting the nested nature of our  
382 variables (**Fig. 4A**; x-axis of **Fig. 4C**; **table S4**). The population-level model (i.e., model P)  
383 captured factors experienced by the whole host population, including average rainfall and  
384 maximum daily temperature in the 30 days before sample collection and random effect splines to  
385 capture monthly and annual cyclicity in microbiome features (e.g., **Fig. 2A and B**). The group-  
386 level model (i.e., model P+G) included all the predictor variables in model P, and added a  
387 random effect spline for each social group, as well as variables to capture temporal changes in  
388 each group's diet, home range use, and group size (**Fig. 4A, 4C**). The host-level model (i.e.,  
389 model P+G+H) included all of the predictor variables in model P+G, and added a random effect  
390 spline for each host, and variables for host traits, including sex, age, and social dominance rank  
391 (**Fig. 4A, 4C**).

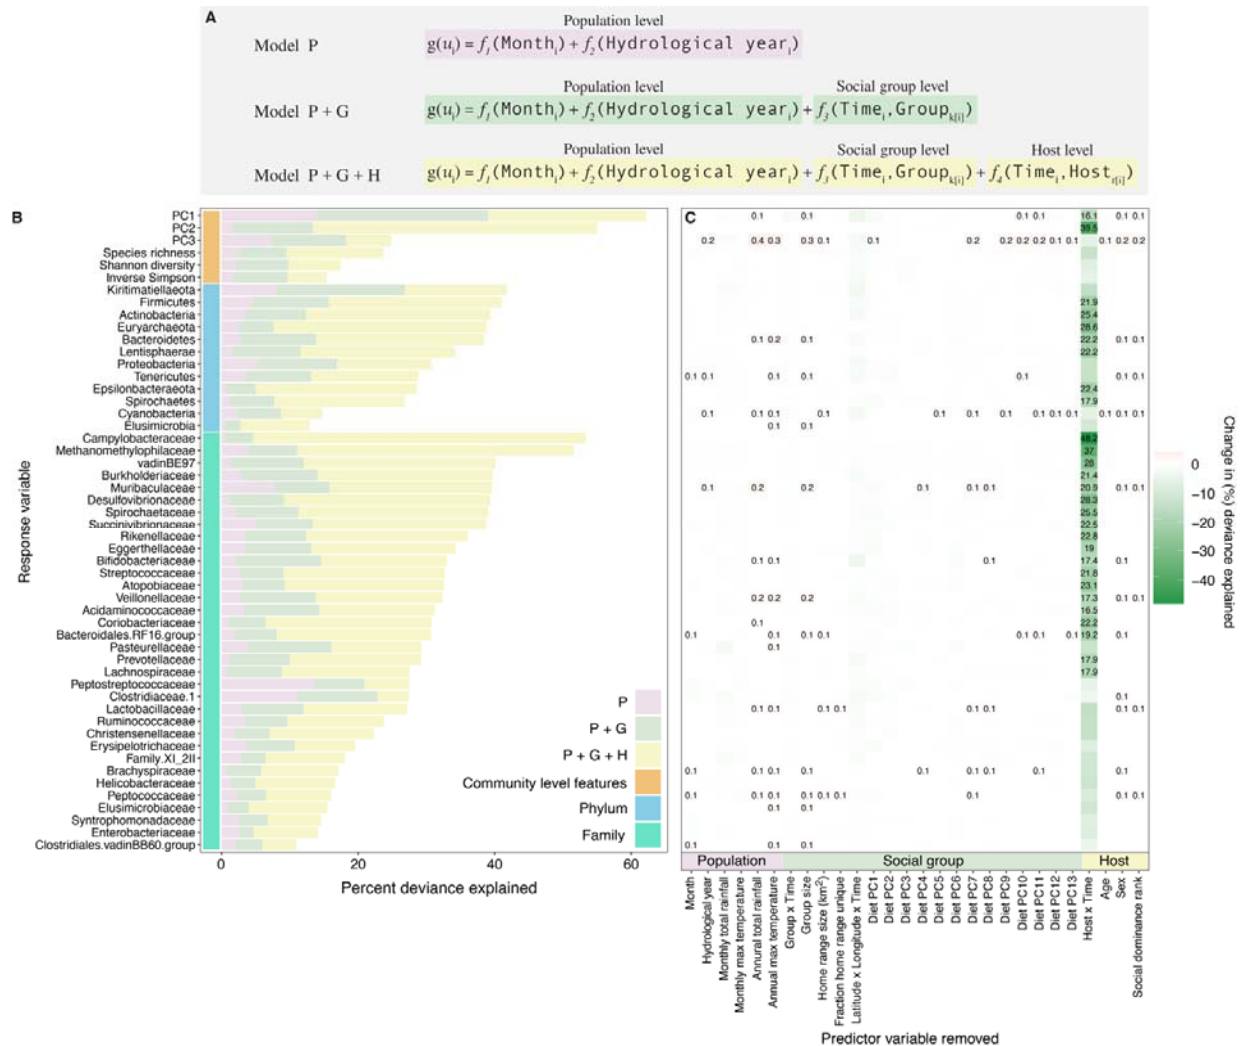

392

393 **Fig. 4. Multilevel modeling identifies idiosyncratic dynamics.** (A) We fit three hierarchical  
 394 GAMs to 52 microbiome features measured in 4,277 samples from the 56 best-sampled baboons  
 395 living in the 5 social groups sampled the longest (between 2002 and 2010; min=48; median =  
 396 72.5; max = 164 samples; **fig. S2**). Each model contained successive sets of predictor variables  
 397 reflecting population-level factors (pink), group-level factors (green) and host-level factors  
 398 (yellow). The factors at each level are listed at the bottom of panel C and defined in **table S4**.  
 399 Panel (B) shows for each microbiome feature (i.e., response variable), the deviance explained by  
 400 model P and the successive sets of predictor variables added in model P+G and model P+G+H,  
 401 respectively (**table S5**). Panel (C) shows the loss in deviance explained for model P+G+H as we  
 402 successively removed each predictor variable in turn from model P+G+H, keeping the model  
 403 otherwise intact (**table S6**). Losses in deviance are shown in green, and we only provide numeric

404 values for losses in deviance > 15%. Gains in deviance are shown in red; we only show numeric  
405 values for gains > 0.1%.

406

407 Consistent with our autocorrelation analyses (**Fig. 3**), comparing the deviance explained  
408 for each microbiome feature across the three models revealed primarily idiosyncratic dynamics  
409 for most microbiome features (**Fig. 4B, 4C**). Specifically, model P only explained on average  
410 3.3% (range = 0.46% to 14.0%) of the deviance across all 52 microbiome features (pink bars in  
411 **Fig 4B; table S5**), compared to 8.1% on average for adding group-level factors to the  
412 population-level model (increase from model P to model P+G; range = 2% to 25%; green bars in  
413 **Fig. 4B; table S5**), and 30.1% of the deviance for including host-level dynamics (model P+G+H;  
414 range = 11.0% to 62.2%) in the same set of features (yellow bars in **Fig. 4B; table S5**).

415 Importantly, the added deviance for model P+G+H compared to model P or model P+G was not  
416 simply caused by including more parameters. Specifically, randomizing host identity and traits  
417 across samples, while keeping each sample's annual, seasonal, and group identity intact, led to a  
418 substantial drop in deviance explained relative to the real data (**fig. S17**). For instance, for PC2,  
419 which captured the strongest host-level effects of all three PCs, the deviance explained by model  
420 P+G+H dropped from 55% to 16.6% when host identity and traits were randomized (**fig. S17**;  
421 see supplement and **fig. S18** for an additional analysis investigating the effect of model  
422 complexity on deviance explained). That said, for PC3, the addition of randomized host-level  
423 dynamics still resulted in more than negligible deviance explained relative to the real data (3% vs  
424 6.6%) suggesting that deviance explained may be inflated for some microbiome features.

425 44 of the 52 microbiome features exhibited greater gains in deviance explained by adding  
426 host-level factors to model P+G, compared to adding group-level factors to model P, with 22  
427 features gaining more than 20% deviance explained between model P+G and model P+G+H  
428 (**Fig. 4B; table S5**). Three of the most common phyla, Actinobacteria, Bacteroidetes, and  
429 Firmicutes all gained >20% deviance explained between model P+G and model P+G+H  
430 (Actinobacteria = 27.1%; Bacteroidetes = 24.6%, and Firmicutes = 25.2%; **Fig. 4B; table S5**).  
431 The most idiosyncratic features (i.e., those that gained >30% deviance explained by adding host-  
432 level factors), were microbiome PC2, the phylum Euryarchaeota, and the families  
433 Campylobacteraceae, Methanomethylophilaceae and Desulfovibrionaceae (**Fig. 4B; table S5**).



434 Notably, even the most synchronous feature, microbiome PC1 (14% deviance explained by the P  
435 model), gained 23.2% deviance explained when adding host-level factors to the P+G model.

436 Removing covariates from model P+G+H one at a time, while keeping all other  
437 covariates intact, revealed that host identity explained nearly all of the deviance in our models  
438 (**Fig. 4C**; **table S5**; average loss in deviance explained by removing host identity = 17.3%  
439 compared to 0.2% deviance for all other factors). Beyond host identity, the next most important  
440 factor was the geographic area where the group had been travelling in the 30 days prior to  
441 sample collection, which on average, explained 1% of the deviance across all 52 features, with  
442 the strongest effects on microbiome PC1, Bifidobacteraceae, and Kiritimatiellaota (**fig. S19**;  
443 **table S5**). The removal of all other individual predictor variables had only minor effects on  
444 deviance explained (**fig. S19**; **table S5**).

445 To investigate whether some of the idiosyncrasy we observed, especially at the host level,  
446 was due to genetic effects, we tested for a relationship between the deviance explained by each  
447 GAM and the narrow-sense heritability ( $h^2$ ) of microbiome taxon abundance as estimated by  
448 Grieneisen et al. (24). We found that higher levels of deviance explained by model P+G+H were  
449 predicted by higher taxon heritability (Pearson correlation:  $R=0.37$ ,  $p=0.016$ ; **Fig. 5A**).  
450 Reassuringly, we found no such effect at the population or group level, as expected since  
451 genotype is a property of individual hosts, not groups or populations (model P+G:  $R=0.047$ ,  
452  $p=0.76$ ; model P:  $R=0.0085$ ,  $p=0.96$ ; **Fig. 5B**). In particular, we explained substantially more  
453 deviance by adding the host level to model P+G for microbiome taxa with moderate to high  $h^2$   
454 values (i.e., those  $> 0.05$ ) than we did for taxa with low  $h^2$  values (model P+G+H: min=16.0,  
455 median=32.6, max=53.4 vs model P+G: min=4.6, median=11.1, max=26.8; **Fig. 5B**). These  
456 results suggest that some idiosyncrasy in gut microbiome dynamics is a consequence of host  
457 differences in genotype. We note, however, that because  $h^2$  estimates from the animal model  
458 cannot be mapped directly onto estimates of deviance explained in GAMs, direct estimates of  
459 genetic versus environmental effects on host dynamics remain an important topic for future  
460 work.

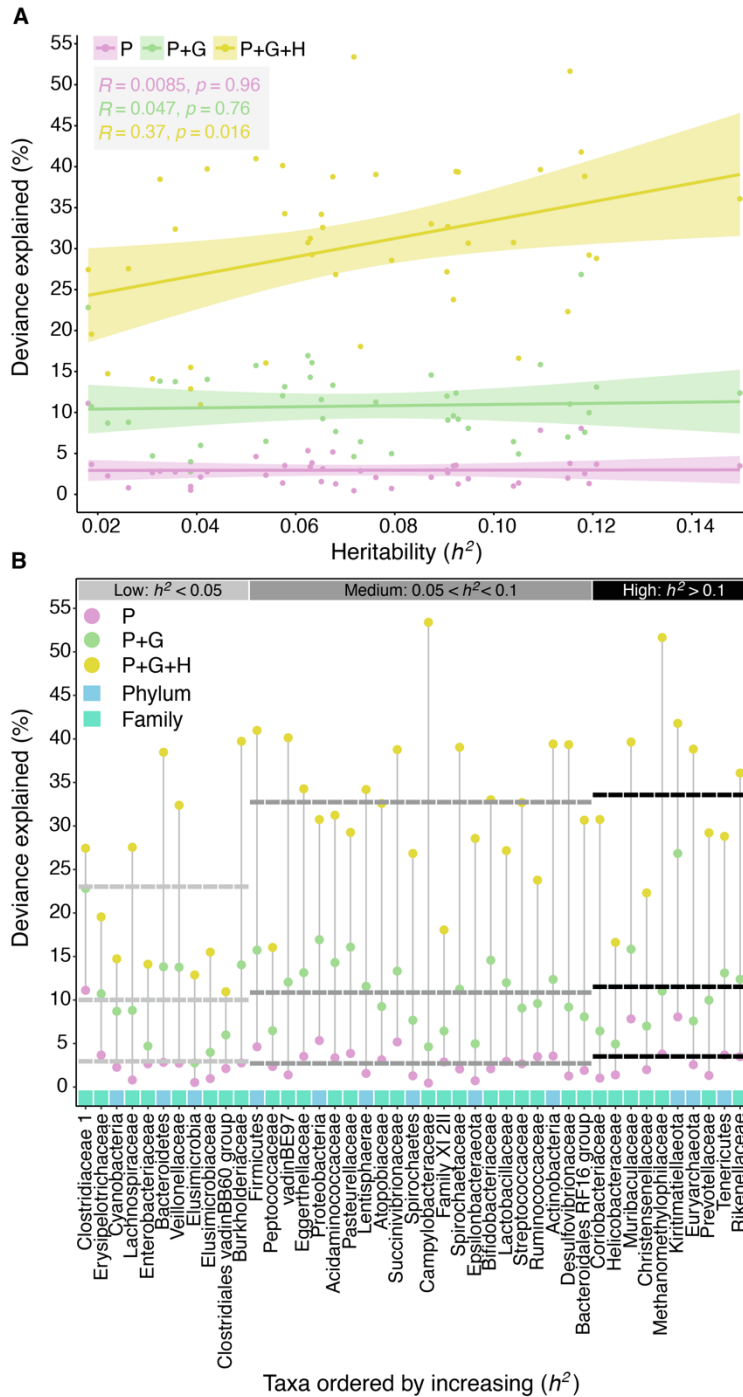

461

462 **Fig. 5. Microbiome taxon heritability is associated with idiosyncratic dynamics. (A)**

463 Deviance explained (y-axis) by the phylum and family level GAMs (from **Fig. 4**) plotted against

464 the focal taxon's heritability estimate ( $h^2$ ; x-axis). Pink, green and yellow denote model P, model

465 P+G and model P+G+H, respectively. **(B)** Deviance explained (y-axis) across the model

466 hierarchy (pink: model P; green: model P+G; yellow: model P+G+H) for each taxonomic feature

467 (i.e., at the phylum and family level; x-axis). The x-axis is ordered by increasing heritability with  
468 light blue and turquoise squares representing phyla and families, respectively. Horizontal dashed  
469 lines show the average deviance explained per model for taxa with low heritability estimates ( $h^2$   
470  $< 0.05$ ; light gray); medium heritability estimates ( $0.05 < h^2 < 0.1$ ; dark gray); and high  
471 heritability estimates ( $h^2 \geq 0.1$ ; black).

472

### 473 **Gut microbiome dynamics among social group members are more synchronized than for** 474 **the host population at large**

475 Previous research in humans and other social mammals, including the Amboseli baboons,  
476 finds that hosts in the same social group often have more similar gut microbiome compositions  
477 than hosts in different social groups (e.g. 32, 48-50). Likewise, in our current data set, several  
478 taxa exhibited abundances that were, on average, higher or lower within a given social group  
479 compared to their average abundance in the host population at large (**fig. S20, S21**). Hence, we  
480 tested whether shared social group membership is linked to greater microbiome synchrony than  
481 hosts in different groups. In support, the patterns of temporal autocorrelation in **Fig. 3A** showed  
482 that hosts in the same group have detectably more similar microbiomes than those in different  
483 groups, especially for samples collected within 10 days of each other (**Fig. 3B**; Kruskal-Wallis:  $p$   
484  $< 2.2 \times 10^{-16}$ ). Likewise, samples from the same group tended to occupy similar ordination space  
485 over time (**video S2**). While small, these group-level similarities were detectable, even for  
486 samples collected more than 2 years apart (**Fig. 3C**; **fig. S11A**). The addition of group-level  
487 splines to our GAMs led to gains in deviance that explained more than 10% for 15 of 52  
488 microbiome features, including all three microbiome PCs, five phyla, and seven families (**Fig.**  
489 **4B, 4C**; **table S5**). Several of these taxa were abundant in hosts, such as Firmicutes,  
490 Bacteroidetes, and Bifidobacteriaceae (**Fig. 4B, 4C**; **table S5**).

491 Because each social group has a somewhat distinctive gut microbiota, the effects of  
492 climate and diet on microbiome dynamics may differ across groups. To test this idea, we added  
493 interaction effects between group identity and climate variables (rain and temperature), or  
494 between group identity and the first three PCs of diet to model P+G+H. However, these  
495 interactions did not lead to substantial gains in deviance explained in our models (**fig. S22**; **table**  
496 **S7**). For instance, adding the climate interactions explained on average an additional 0.95%

497 deviance across all 52 features (range = -1.9% to 5.4%; **table S7**), and diet interactions  
498 explained, on average, an additional 1.2% deviance across all 52 features (range = -0.7% to  
499 5.6%; **table S7**).

500 Gut microbial congruence among group members could also be linked to shared  
501 behaviors and environments: baboons in the same group eat the same foods at the same time,  
502 travel as a unit across the landscape, and may be grooming partners that are frequently in  
503 physical contact (**Fig. 1B, 1C; video S1; (24, 27-31)**). Indeed, after host identity, the next most  
504 important predictor variable in model P+G+H was the group's home range in the 30 days before  
505 sample collection (**fig. S19; table S6**). Despite previous evidence for increased similarity in  
506 microbiome profiles among grooming partners in the Amboseli baboons (32), we did not find  
507 evidence for this pattern in our current data set (**fig. S23**). Indeed, samples collected within 30  
508 days of each other from individuals with strong grooming bonds were not substantially more  
509 similar than samples from animals with weak or no observed grooming relationship (mean  
510 Aitchison similarity between pairs with strong bonds = 0.645; mean Aitchison similarity between  
511 pairs weak or no bond = 0.646; **fig. S24**). Because of differences in methodology, the lack of a  
512 grooming effect in this data set should be interpreted with caution. Our prior research on this  
513 topic (32) characterized microbial communities using shotgun metagenomic sequencing from  
514 >90% of social network members, all within 30 days of each other. In contrast, this current data  
515 set relies on 16S rRNA gene sequencing data from sparsely-sampled networks. Shotgun  
516 metagenomic data provide much higher taxonomic resolution than 16S rRNA identities, and may  
517 therefore more accurately capture the direct transmission between hosts.

518

## 519 **Conclusions**

520 We tested, for the first time, whether gut microbiome dynamics are synchronized among  
521 hosts experiencing strong synchronizing forces, including shared environments, similar diets,  
522 and high rates of between-host microbial dispersal. Despite these forces, baboons in Amboseli  
523 exhibit largely idiosyncratic gut microbiome dynamics: samples from the same baboon collected  
524 within a few days of each other were much more similar to each other than samples from  
525 different baboons, and host-specific factors, especially host identity, collectively explained 30%  
526 of the deviance in microbiome dynamics, compared to just 3% for factors shared across the host

527 population. These idiosyncratic dynamics suggest that microbiome personalization is a  
528 widespread phenomenon that is likely not unique to humans, and instead may be shared with  
529 other social mammals. This microbiome personalization likely emerges from ecological and  
530 evolutionary phenomena that are a normal part of complex microbial communities, such as  
531 priority effects, functional redundancy, and horizontal gene flow. Together, these forces are  
532 expected to lead microbes with the same taxonomic identity in different hosts to perform  
533 somewhat different functions, experience different competitive landscapes and selective regimes,  
534 and play different ecological roles (15, 16). As a result, the same microbial taxa may often  
535 respond in different ways to environmental fluctuations, chance events, and/or interactions with  
536 other microbes in different hosts, producing personalized, rather than synchronized dynamics.

537 This personalization means that microbiome research aimed at improving human and  
538 animal health could face challenges to developing broadly applicable therapies, beyond those  
539 caused by heterogeneity in host diets, behaviors, and environments. Microbiome researchers aim  
540 to predict microbiome changes, link microbiome taxa and dynamics to health outcomes, and  
541 design microbiome interventions that work well for large segments of the human population.  
542 Personalization in humans is already presenting problems in attaining these goals. For instance,  
543 predictive models of gut microbiome dynamics from one person have been shown to fail when  
544 they are applied to other people (19). Our results suggest that microbiome predictions and  
545 interventions focused on microbiome taxa will require approaches that are either personalized or  
546 focus on microbial functions, as opposed to taxonomic identities. Even then, “universal”  
547 microbiome therapies that work the same way for all hosts may be unattainable. Instead,  
548 microbiome interventions will likely work best when they are designed for specific host groups  
549 or populations that have shared compositions and dynamics. Further, we expect that the types of  
550 prediction and intervention efforts that will suffer least from gut microbiome personalization are  
551 those that focus on microbiome functional traits (e.g., metabolites; functional pathways), rather  
552 than taxonomic composition. Together, our results provide novel insights about the extent and  
553 ecological causes of microbiome personalization, and point towards ways to overcome these  
554 barriers.

555

556 **Acknowledgments:**



557 We thank Jeanne Altmann for her essential role in stewarding the Amboseli Baboon Project, and  
558 in collecting and maintaining the fecal samples used in this manuscript. We thank the Kenya  
559 Wildlife Service, the National Council for Science, Technology, and Innovation, and the  
560 National Environment Management Authority for permission to conduct research and collect  
561 biological samples in Kenya. We also thank the University of Nairobi, Institute of Primate  
562 Research, National Museums of Kenya, the Amboseli-Longido pastoralist communities, the  
563 Enduimet Wildlife Management Area, Ker & Downey Safaris, Air Kenya, and Safarilink for  
564 their cooperation and assistance in the field. We thank Karl Pinc for managing and designing the  
565 database. We also thank Tawni Voyles, Anne Dumaine, Yingying Zhang, Meghana Rao, Tauras  
566 Vilgalys, Amanda Lea, Noah Snyder-Mackler, Paul Durst, Jay Zussman, Garrett Chavez, and  
567 Reena Debray for contributing to fecal sample processing. Complete acknowledgments for the  
568 ABRP can be found online at <https://amboselibaboons.nd.edu/acknowledgements/>.

569 Funding: This work was supported by the National Science Foundation and the National  
570 Institutes of Health, especially NSF Rules of Life Award DEB 1840223 (EAA, JAG), and the  
571 National Institute on Aging R21 AG055777 (EAA, RB) and NIH R01 AG053330 (EAA), and  
572 NIH R35 GM128716 (RB), the Duke University Population Research Institute P2C-HD065563  
573 (pilot to JT), the University of Notre Dame's Eck Institute for Global Health (EAA), and the  
574 Notre Dame Environmental Change Initiative (EAA). Since 2000, long-term data collection in  
575 Amboseli has been supported by NSF and NIH, including IOS 1456832 (SCA), IOS 1053461  
576 (EAA), DEB 1405308 (JT), IOS 0919200 (SCA), DEB 0846286 (SCA), DEB 0846532 (SCA),  
577 IBN 0322781 (SCA), IBN 0322613 (SCA), BCS 0323553 (SCA), BCS 0323596 (SCA),  
578 P01AG031719 (SCA), R21AG049936 (JT, SCA), R03AG045459 (JT, SCA), R01AG034513  
579 (SCA), R01HD088558 (JT), and P30AG024361 (SCA). We also thank Duke University,  
580 Princeton University, the University of Notre Dame, the Chicago Zoological Society, the Max  
581 Planck Institute for Demographic Research, the L.S.B. Leakey Foundation and the National  
582 Geographic Society for support at various times over the years.

583 Author contributions: EAA, JRB, LBB, RB, JAG, SM, and JT designed the research; EAA,  
584 SCA, RB, MRD, LG, JG, LRG, NG, SM, VY, NHL, TLW, RSM, JKW, LS, LBB, and JT,  
585 produced the data; JRB, TJG, DAWAMJ, LG, JCG performed the bioinformatics; JRB, KR, SM,  
586 performed the statistical analyses. EAA and JRB wrote the manuscript with important  
587 contributions from all authors.

588 Competing interests: The authors declare no competing interests.

589 Data and materials availability: 16S rRNA gene sequences are deposited on EBI-ENA (project  
590 ERP119849) and Qiita [study 12949, (51)]. Analyzed data and code is available on the first  
591 author's Open Science Framework / GitHub repository; for peer-review purposes, this is an  
592 anonymized link: [https://osf.io/erdxa/?view\\_only=3323f05a5a9b479bac1124a5b07a62a9](https://osf.io/erdxa/?view_only=3323f05a5a9b479bac1124a5b07a62a9) .

593

## 594 **References**

- 595 1. B. H. Schlomann, R. Parthasarathy, Timescales of gut microbiome dynamics. *Curr Opin*  
596 *Microbiol* **50**, 56-63 (2019).
- 597 2. H. Koch, P. Schmid-Hempel, Socially transmitted gut microbiota protect bumble bees  
598 against an intestinal parasite. *Proceedings of the National Academy of Sciences* **108**,  
599 19288-19292 (2011).
- 600 3. C. T. Finnicum, J. J. Beck, C. V. Dolan, C. Davis, G. Willemsen, E. A. Ehli, D. I.  
601 Boomsma, G. E. Davies, E. J. C. de Geus, Cohabitation is associated with a greater  
602 resemblance in gut microbiota which can impact cardiometabolic and inflammatory risk.  
603 *BMC Microbiology* **19**, 230 (2019).
- 604 4. A. Bashan, T. E. Gibson, J. Friedman, V. J. Carey, S. T. Weiss, E. L. Hohmann, Y. Y.  
605 Liu, Universality of human microbial dynamics. *Nature* **534**, 259-262 (2016).
- 606 5. E. K. Costello, K. Stagaman, L. Dethlefsen, B. J. Bohannan, D. A. Relman, The  
607 application of ecological theory toward an understanding of the human microbiome.  
608 *Science* **336**, 1255-1262 (2012).
- 609 6. E. T. Miller, R. Svanback, B. J. Bohannan, Microbiomes as metacommunities:  
610 understanding host-associated microbes through metacommunity ecology. *Trends in*  
611 *Ecology & Evolution*, (2018).
- 612 7. J. Bjork, C. Díez-Vives, C. Astudillo-García, E. A. Archie, J. M. Montoya, Vertical  
613 transmission of sponge microbiota is inconsistent and unfaithful. *Nature Ecology &*  
614 *Evolution* **3**, 1172-1183 (2019).
- 615 8. M. Sieber, L. Pita, N. Weiland-Brauer, P. Dirksen, J. Wang, B. Mortzfeld, S.  
616 Franzenburg, R. A. Schmitz, J. F. Baines, S. Fraune, U. Hentschel, H. Schulenburg, T. C.  
617 G. Bosch, A. Traulsen, Neutrality in the Metaorganism. *PLoS Biol* **17**, e3000298 (2019).
- 618 9. A. T. Tredennick, C. dr Mazancourt, M. Loreau, P. B. Adler, Environmental responses,  
619 not species interactions, determine synchrony of dominant species in semiarid grasslands.  
620 *Ecology* **98**, 971-981 (2017).
- 621 10. M. Loreau, C. de Mazancourt, Species synchrony and its drivers: neutral and nonneutral  
622 community dynamics in fluctuating environments. *American Naturalist* **172**, E48-66  
623 (2008).
- 624 11. F. I. Isbell, H. W. Polley, B. J. Wilsey, Biodiversity, productivity and the temporal  
625 stability of productivity: patterns and processes. *Ecol Lett* **12**, 443-451 (2009).
- 626 12. A. Hector, Y. Hautier, P. Saner, L. Wacker, R. Bagchi, J. Joshi, M. Scherer-Lorenzen, E.  
627 M. Spehn, E. Bazeley-White, M. Weilenmann, M. C. Caldeira, P. G. Dimitrakopoulos, J.  
628 A. Finn, K. Huss-Danell, A. Jumpponen, C. P. H. Mulder, C. Palmborg, J. S. Pereira, A.  
629 S. D. Siamantziouras, A. C. Terry, A. Y. Troumbis, B. Schmid, M. Loreau, General

- 630 stabilizing effects of plant diversity on grassland productivity through population  
631 asynchrony and overyielding. *Ecology* **91**, 2213–2220 (2010).
- 632 13. C. de Mazancourt, F. Isbell, A. Larocque, F. Berendse, E. De Luca, J. B. Grace, B.  
633 Haegeman, H. W. Polley, C. Roscher, B. Schmid, D. Tilman, J. van Ruijven, A. Weigelt,  
634 B. J. Wilsey, M. Loreau, Predicting ecosystem stability from community composition and  
635 biodiversity. *Ecology Letters* **16**, 617–625 (2013).
- 636 14. K. Gross, B. J. Cardinale, J. W. Fox, A. Gonzalez, M. Loreau, H. W. Polley, P. B. Reich,  
637 J. van Ruijven, Species richness and the temporal stability of biomass production: a new  
638 analysis of recent biodiversity experiments. *Am Nat* **183**, 1–12 (2014).
- 639 15. S. Louca, M. F. Polz, F. Mazel, M. B. N. Albright, J. A. Huber, M. I. O'Connor, M.  
640 Ackermann, A. S. Hahn, D. S. Srivastava, S. A. Crowe, M. Doebeli, L. W. Parfrey,  
641 Function and functional redundancy in microbial systems. *Nat Ecol Evol* **2**, 936–943  
642 (2018).
- 643 16. P. B. Rainey, S. D. Quistad, Toward a dynamical understanding of microbial  
644 communities. *Philos Trans R Soc Lond B Biol Sci* **375**, 20190248 (2020).
- 645 17. G. E. Flores, J. G. Caporaso, J. B. Henley, J. R. Rideout, D. Domogala, J. Chase, J. W.  
646 Leff, Y. Vazquez-Baeza, A. Gonzalez, R. Knight, R. R. Dunn, N. Fierer, Temporal  
647 variability is a personalized feature of the human microbiome. *Genome Biology* **15**, 531  
648 (2014).
- 649 18. J. G. Caporaso, C. L. Lauber, E. K. Costello, D. Berg-Lyons, A. Gonzalez, J. Stombaugh,  
650 D. Knights, P. Gajer, J. Ravel, N. Fierer, J. I. Gordon, R. Knight, Moving pictures of the  
651 human microbiome. *Genome Biology* **12**, R50 (2011).
- 652 19. A. J. Johnson, P. Vangay, G. A. Al-Ghalith, B. M. Hillmann, T. L. Ward, R. R. Shields-  
653 Cutler, A. D. Kim, A. K. Shmagel, A. N. Syed, S. Personalized Microbiome Class, J.  
654 Walter, R. Menon, K. Koecher, D. Knights, Daily Sampling Reveals Personalized Diet-  
655 Microbiome Associations in Humans. *Cell Host & Microbe* **25**, 789–802 (2019).
- 656 20. D. Rothschild, O. Weissbrod, E. Barkan, A. Kurilshikov, T. Korem, D. Zeevi, P. I.  
657 Costea, A. Godneva, I. N. Kalka, N. Bar, S. Shilo, D. Lador, A. V. Vila, N. Zmora, M.  
658 Pevsner-Fischer, D. Israeli, N. Kosower, G. Malka, B. C. Wolf, T. Avnit-Sagi, M. Lotan-  
659 Pompan, A. Weinberger, Z. Halpern, S. Carmi, J. Fu, C. Wijmenga, A. Zhernakova, E.  
660 Elinav, E. Segal, Environment dominates over host genetics in shaping human gut  
661 microbiota. *Nature* **555**, 210–215 (2018).
- 662 21. G. Falony, M. Joossens, S. Vieira-Silva, J. Wang, Y. Darzi, K. Faust, A. Kurilshikov, M.  
663 J. Bonder, M. Valles-Colomer, D. Vandeputte, R. Y. Tito, S. Chaffron, L. Rymenans, C.  
664 Verspecht, L. De Sutter, G. Lima-Mendez, K. D'Hoe, K. Jonckheere, D. Homola, R.  
665 Garcia, E. F. Tigchelaar, L. Eeckhaut, J. Fu, L. Henckaerts, A. Zhernakova, C.  
666 Wijmenga, J. Raes, Population-level analysis of gut microbiome variation. *Science* **352**,  
667 560–564 (2016).
- 668 22. A. Zhernakova, A. Kurilshikov, M. J. Bonder, E. F. Tigchelaar, M. Schirmer, T. Vatanen,  
669 Z. Mujagic, A. V. Vila, G. Falony, S. Vieira-Silva, J. Wang, F. Imhann, E. Brandsma, S.  
670 A. Jankipersadsing, M. Joossens, M. C. Cenit, P. Deelen, M. A. Swertz, R. K. Weersma,  
671 E. J. M. Feskens, M. G. Netea, D. Gevers, D. Jonkers, L. Franke, Y. S. Aulchenko, C.  
672 Huttenhower, J. Raes, M. H. Hofker, R. J. Xavier, C. Wijmenga, J. Y. Fu, L. C. Study,  
673 Population-based metagenomics analysis reveals markers for gut microbiome  
674 composition and diversity. *Science* **352**, 565–569 (2016).

- 675 23. S. C. Alberts, J. Altmann, "The Amboseli Baboon Research Project: Themes of  
676 continuity and change" in *Long-term field studies of primates*, P. Kappeler, D. P. Watts,  
677 Eds. (Springer Verlag, 2012), pp. 261-287.
- 678 24. L. Grieneisen, M. Dasari, T. J. Gould, J. R. Bjork, J. C. Grenier, V. Yotova, D. Jansen,  
679 N. Gottel, J. B. Gordon, N. H. Learn, L. R. Gesquiere, T. L. Wango, R. S. Mututua, J. K.  
680 Warutere, I. L. Siod, J. A. Gilbert, L. B. Barreiro, S. C. Alberts, J. Tung, E. A. Archie, R.  
681 Blekhman, Gut microbiome heritability is nearly universal but environmentally  
682 contingent. *Science* **373**, 181-186 (2021).
- 683 25. T. Ren, L. Grieneisen, S. C. Alberts, E. A. Archie, M. Wu, Development, diet, and  
684 dynamism: longitudinal and cross-sectional predictors of gut microbial communities in  
685 wild baboons. *Environmental Microbiology* **18**, 1312-1325 (2016).
- 686 26. L. Grieneisen, M. J. Charpentier, J. Altmann, S. C. Alberts, R. Blekhman, J. Tung, E. A.  
687 Archie, Genes, geology, and germs: gut microbiota across a primate hybrid zone are  
688 explained by site soil properties, not host species. *Proceedings of the Royal Society* **286**,  
689 20190431 (2019).
- 690 27. J. B. Silk, Activities and feeding behavior of free-ranging pregnant baboons.  
691 *International Journal of Primatology* **8**, 593-613 (1987).
- 692 28. S. A. Altmann, *Foraging for Survival: Yearling Baboons in Africa* (University of  
693 Chicago Press, Chicago, 1998).
- 694 29. A. M. Bronikowski, J. Altmann, Foraging in a variable environment: Weather patterns  
695 and the behavioral ecology of baboons. *Behavioral Ecology and Sociobiology* **39**, 11-25  
696 (1996).
- 697 30. P. Muruthi, J. Altmann, S. Altmann, Resource base, parity and reproductive condition  
698 affect females' feeding time and nutrient intake within and between groups of a baboon  
699 population. *Oecologia* **87**, 467-472 (1991).
- 700 31. J. M. Shopland, Food quality, spatial deployment, and the intensity of feeding  
701 interference in yellow baboons (*Papio cynocephalus*). *Behav Ecol Sociobiol* **21**, 149-156  
702 (1987).
- 703 32. J. Tung, L. B. Barriero, M. B. Burns, J. C. Grenier, J. Lynch, L. E. Grieneisen, J.  
704 Altmann, S. C. Alberts, R. Blekhman, E. A. Archie, Social networks predict gut  
705 microbiome composition in wild baboons. *eLife* **4**, e05224 (2015).
- 706 33. J. T. Morton, C. Marotz, A. Washburne, J. Silverman, L. S. Zaramela, A. Edlund, K.  
707 Zengler, R. Knight, Establishing microbial composition measurement standards with  
708 reference frames. *Nat Commun* **10**, 2719 (2019).
- 709 34. G. B. Gloor, J. M. Macklaim, V. Pawlowsky-Glahn, J. J. Egozcue, Microbiome datasets  
710 are compositional: and this is not optional. *Front Microbiol* **8**, 2224 (2017).
- 711 35. R. R Core Team, "R: A language and environment for statistical computing. (available at  
712 <http://www.R-project.org/>)" (2020).
- 713 36. W. T. Sloan, M. Lunn, S. Woodcock, I. M. Head, S. Nee, T. P. Curtis, Quantifying the  
714 roles of immigration and chance in shaping prokaryote community structure.  
715 *Environmental Microbiology* **8**, 732-740 (2006).
- 716 37. W. T. Sloan, S. Woodcock, M. Lunn, I. M. Head, T. P. Curtis, Modeling Taxa-  
717 Abundance Distributions in Microbial Communities using Environmental Sequence Data.  
718 *Microbial Ecology* **53**, 443-455 (2007).



- 719 38. A. R. Burns, W. Zac Stephens, K. Stagaman, S. Wong, J. F. Rawls, K. Guillemin, B. J.  
720 Bohannan, Contribution of neutral processes to the assembly of gut microbial  
721 communities in the zebrafish over host development. *ISME Journal* **10**, 655-664 (2016).
- 722 39. D. Sprockett, tyRa: Build Models for Microbiome Data. GitHub repository (available at  
723 <https://danielsprockett.github.io/tyRa/articles/tyRa.html>). (2020).
- 724 40. J. Oksanen, F. G. Blanchet, M. Friendly, R. Kindt, P. Legendre, D. McGlenn, P. R.  
725 Minchin, R. B. O'Hara, G. L. Simpson, P. Solymos, M. Henry, H. Stevens, E. Szoecs, H.  
726 Wagner, vegan: Community Ecology Package. R package version 2.5-7. (2020).
- 727 41. S. N. Wood, Stable and Efficient Multiple Smoothing Parameter Estimation for  
728 Generalized Additive Models. *Journal of the American Statistical Association* **99**, 673-  
729 686 (2004).
- 730 42. S. N. Wood, Fast stable restricted maximum likelihood and marginal likelihood  
731 estimation of semiparametric generalized linear models. *Journal of the Royal Statistical*  
732 *Society: Series B (Statistical Methodology)* **73**, 3–36  
733 (2011).
- 734 43. S. N. Wood, *Generalized Additive Models: An Introduction with R, Second Edition* (CRC  
735 Press, 2017).
- 736 44. A. L. Hicks, K. J. Lee, M. Couto-Rodriguez, J. Patel, R. Sinha, C. Guo, S. H. Olson, A.  
737 Seimon, T. A. Seimon, A. U. Ondzie, W. B. Karesh, P. Reed, K. N. Cameron, W. I.  
738 Lipkin, B. L. Williams, Gut microbiomes of wild great apes fluctuate seasonally in  
739 response to diet. *Nat Commun* **9**, 1786 (2018).
- 740 45. J. D. Orkin, F. A. Campos, M. S. Myers, S. E. Cheves Hernandez, A. Guadamuz, A. D.  
741 Melin, Seasonality of the gut microbiota of free-ranging white-faced capuchins in a  
742 tropical dry forest. *ISME J* **13**, 183-196 (2019).
- 743 46. A. Baniel, K. R. Amato, J. C. Beehner, T. J. Bergman, A. Mercer, R. F. Perlman, L.  
744 Petruccio, L. Reitsema, S. Sams, A. Lu, N. Snyder-Mackler, Seasonal shifts in the gut  
745 microbiome indicate plastic responses to diet in wild geladas. *Microbiome* **9**, 26 (2021).
- 746 47. J. P. Mellard, P. Audoye, M. Loreau, Seasonal patterns in species diversity across  
747 biomes. *Ecology* **100**, e02627 (2019).
- 748 48. A. H. Moeller, S. Foerster, M. L. Wilson, A. E. Pusey, B. H. Hahn, H. Ochman, Social  
749 behavior shapes the chimpanzee pan-microbiome. *Science Advances* **2**, e1500997 (2016).
- 750 49. O. Kolodny, M. Weinberg, L. Reshef, L. Harten, A. Hefetz, U. Gophna, M. W. Feldman,  
751 Y. Yovel, Coordinated change at the colony level in fruit bat fur microbiomes through  
752 time. *Nature Ecology & Evolution* **3**, 116-124 (2019).
- 753 50. S. Lax, D. P. Smith, J. Hampton-Marcell, S. M. Owens, K. M. Handley, N. M. Scott, S.  
754 M. Gibbons, P. Larsen, B. D. Shogan, S. Weiss, J. L. Metcalf, L. K. Ursell, Y. Vazquez-  
755 Baeza, W. Van Treuren, N. A. Hasan, M. K. Gibson, R. Colwell, G. Dantas, R. Knight, J.  
756 A. Gilbert, Longitudinal analysis of microbial interaction between humans and the indoor  
757 environment. *Science* **345**, 1048-1052 (2014).
- 758 51. A. Gonzalez, J. A. Navas-Molina, T. Kosciolk, D. McDonald, Y. Vazquez-Baeza, G.  
759 Ackermann, J. DeReus, S. Janssen, A. D. Swafford, S. B. Orchanian, J. G. Sanders, J.  
760 Shorenstein, H. Holste, S. Petrus, A. Robbins-Pianka, C. J. Brislawn, M. Wang, J. R.  
761 Rideout, E. Bolyen, M. Dillon, J. G. Caporaso, P. C. Dorrestein, R. Knight, Qiita: rapid,  
762 web-enabled microbiome meta-analysis. *Nat Methods* **15**, 796-798 (2018).

763
